# Supplementary material for: Mitochondrial targeted HSP90 inhibitor Gamitrinib-TPP (G-TPP) induces PINK1/Parkin-dependent mitophagy
Source: PubMed Central journal article supplement (PMC5739729; doi:10.18632/oncotarget.22287), 2017-11-06
Supplement: oncotarget-08-106233-s001.pdf [file oncotarget-08-106233-s001.pdf]

# Mitochondrial targeted HSP90 inhibitor Gamitrinib-TPP (G-TPP) induces PINK1/Parkin-dependent mitophagy

## SUPPLEMENTARY MATERIALS

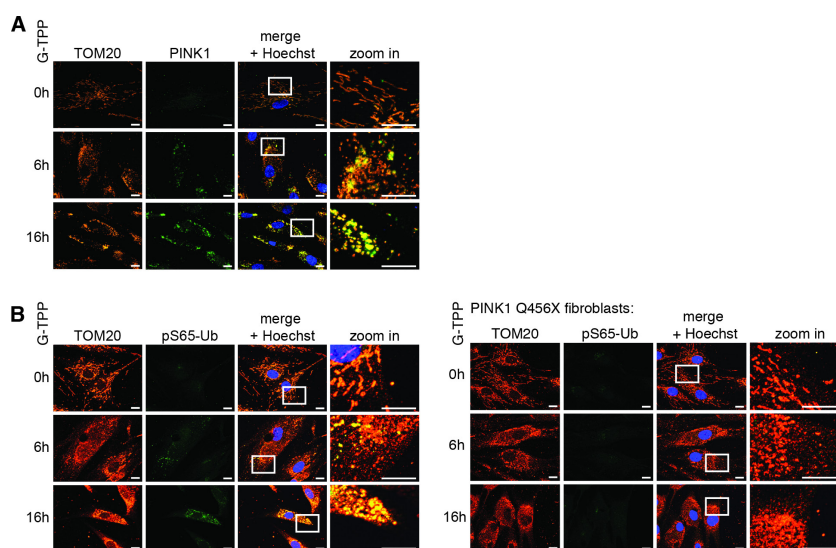

**Supplementary Figure 1:** (A, B) Fibroblasts were stained with antibodies against (A) PINK1 or (B) pS65-Ub (green). Mitochondria were stained with antibodies against TOM20 (red) and nuclei with Hoechst (blue). Scale bars correspond to 10  $\mu$ m. The specificity of the pS65-Ub signal was confirmed by using a fibroblast line with a homozygous PINK1 Q456X loss of function mutation.
